# Supplementary material
Source: publisher figshare collection journal article supplement (https://geolsoc.figshare.com/articles/dataset/_/3453065)
Supplement: Supplementary file 3 [file 1]

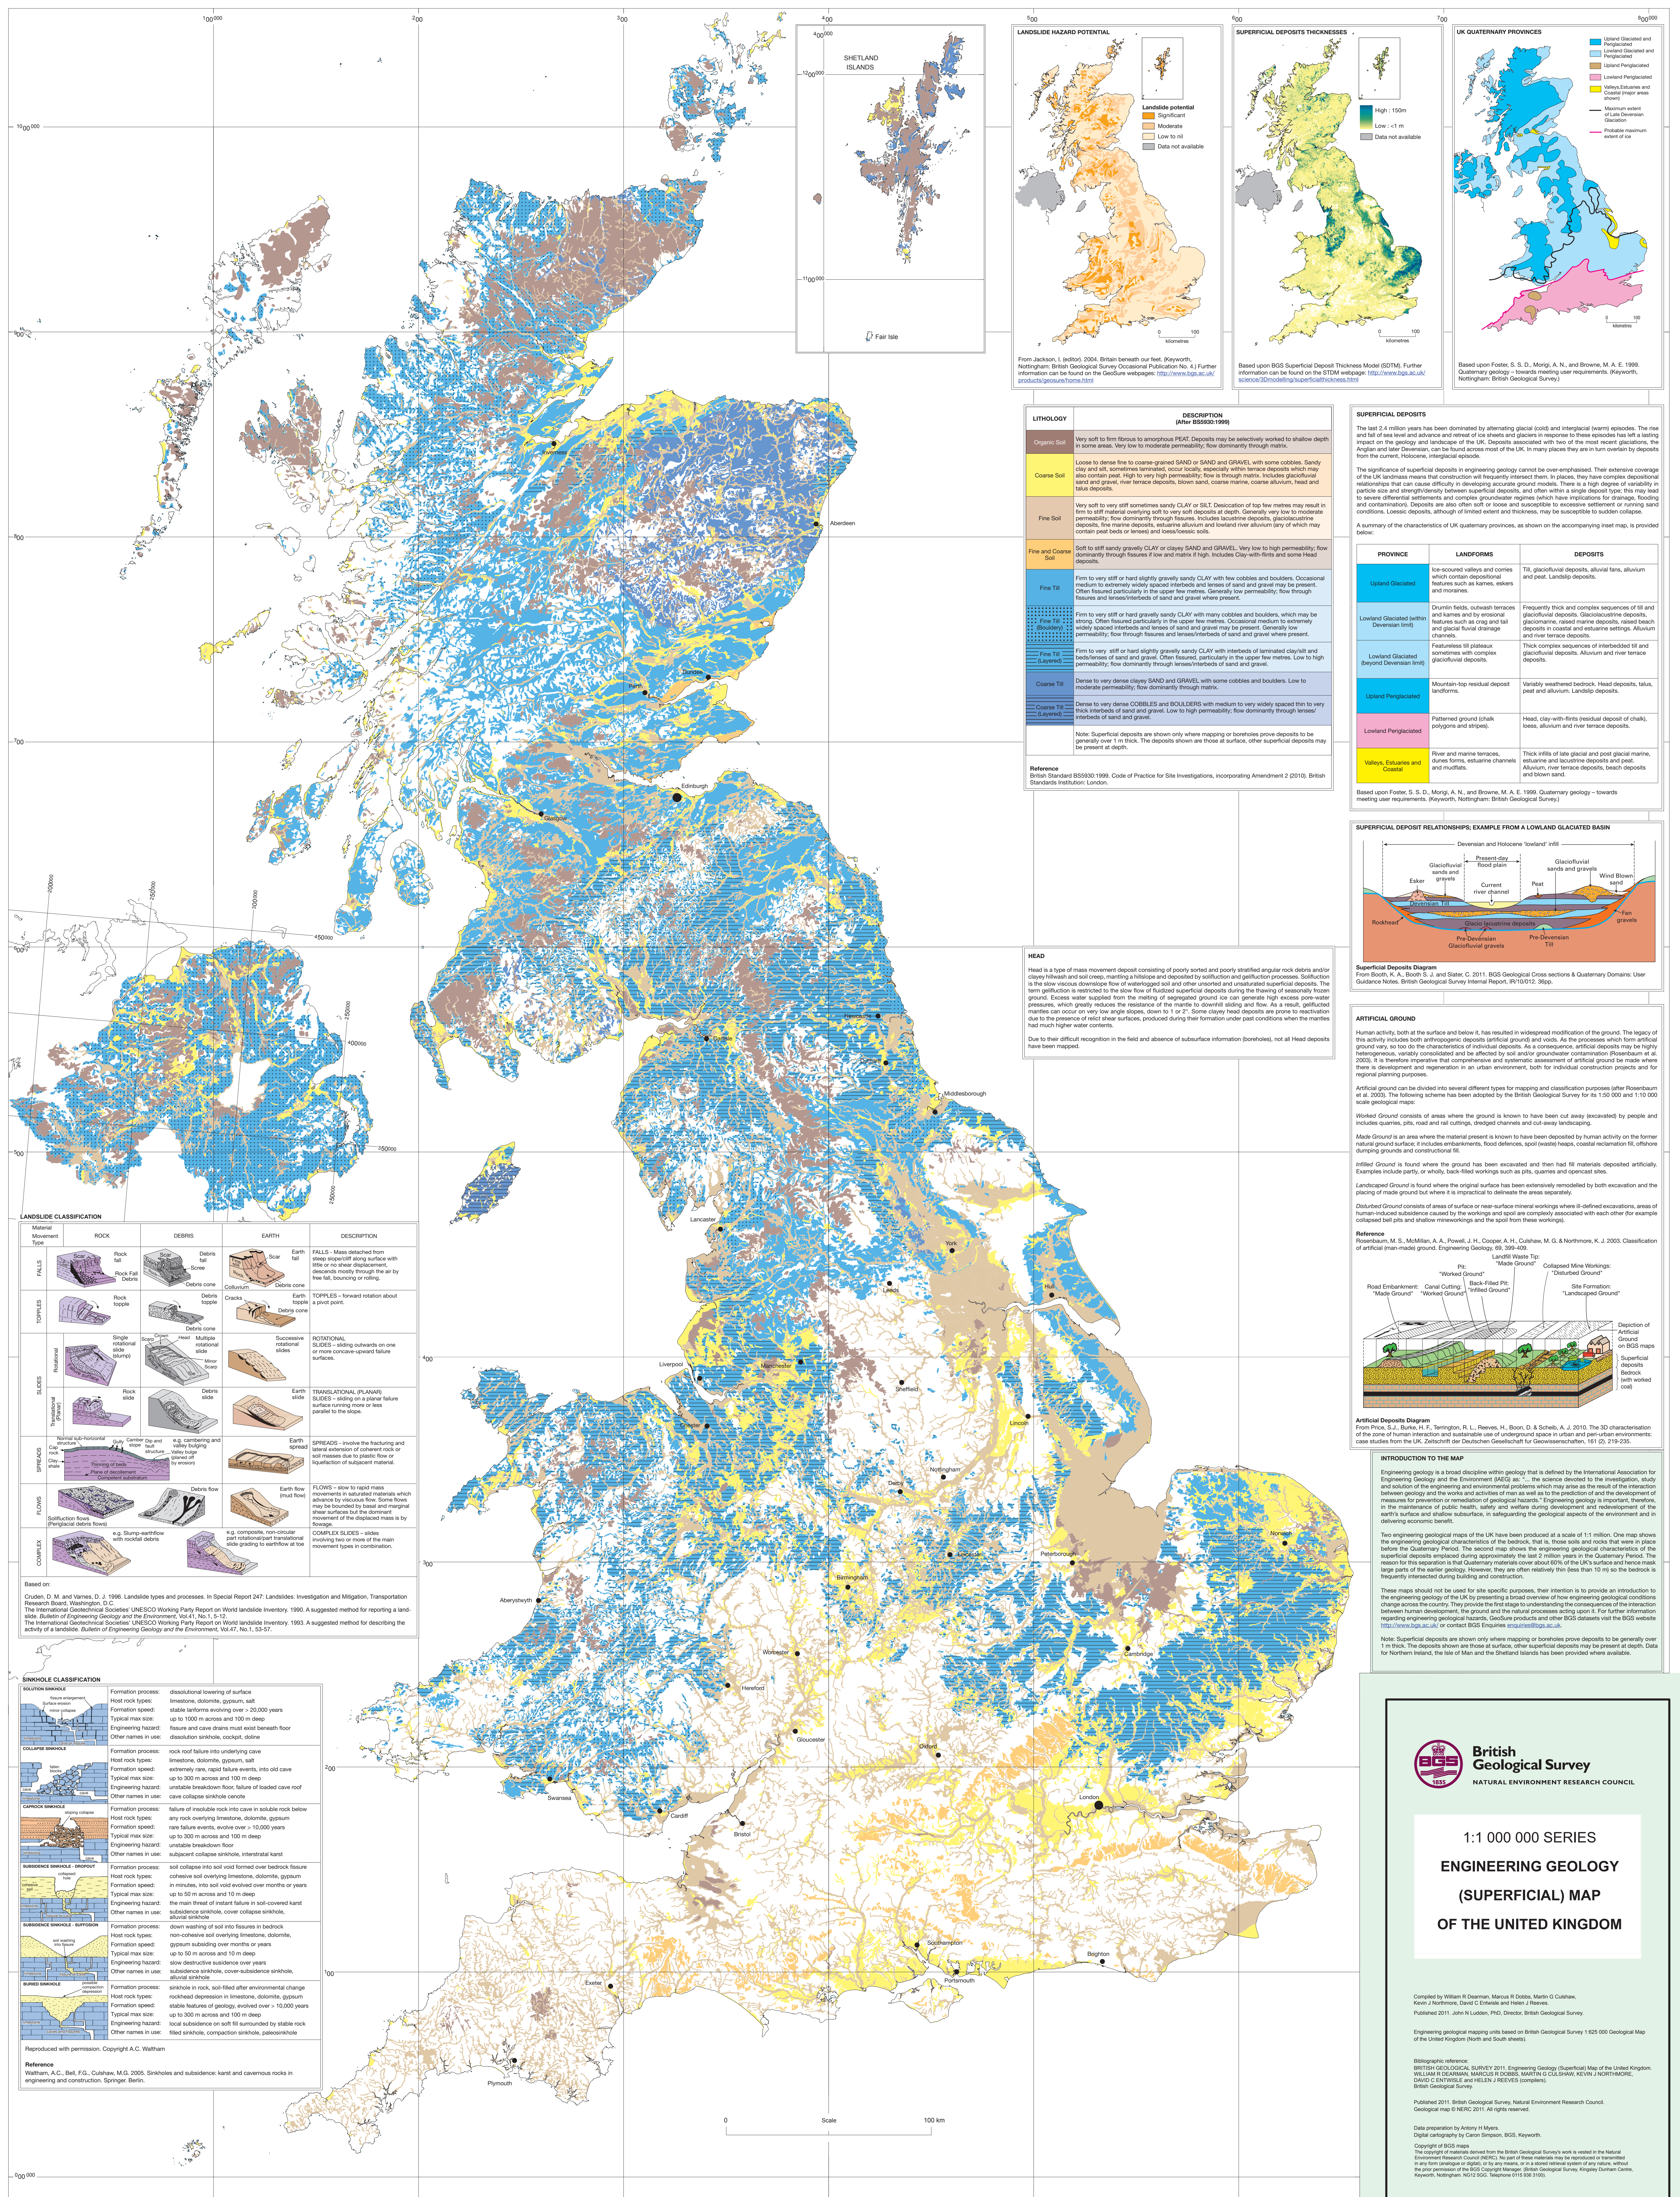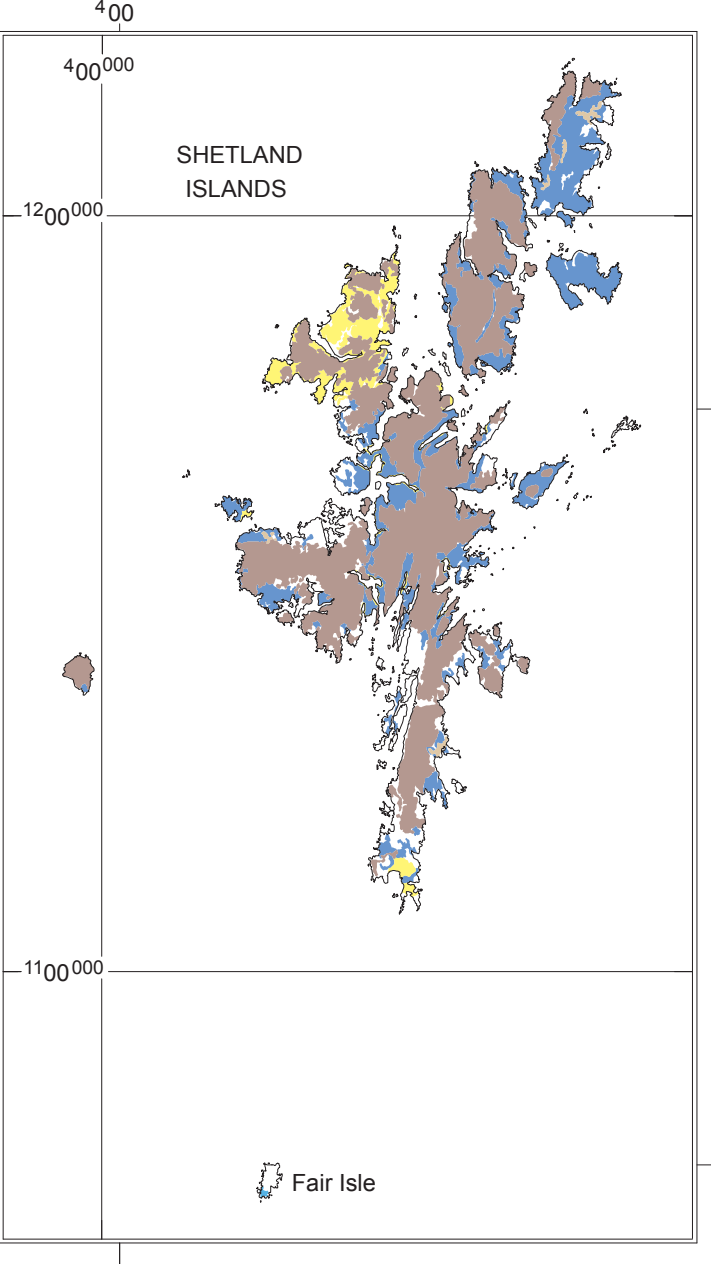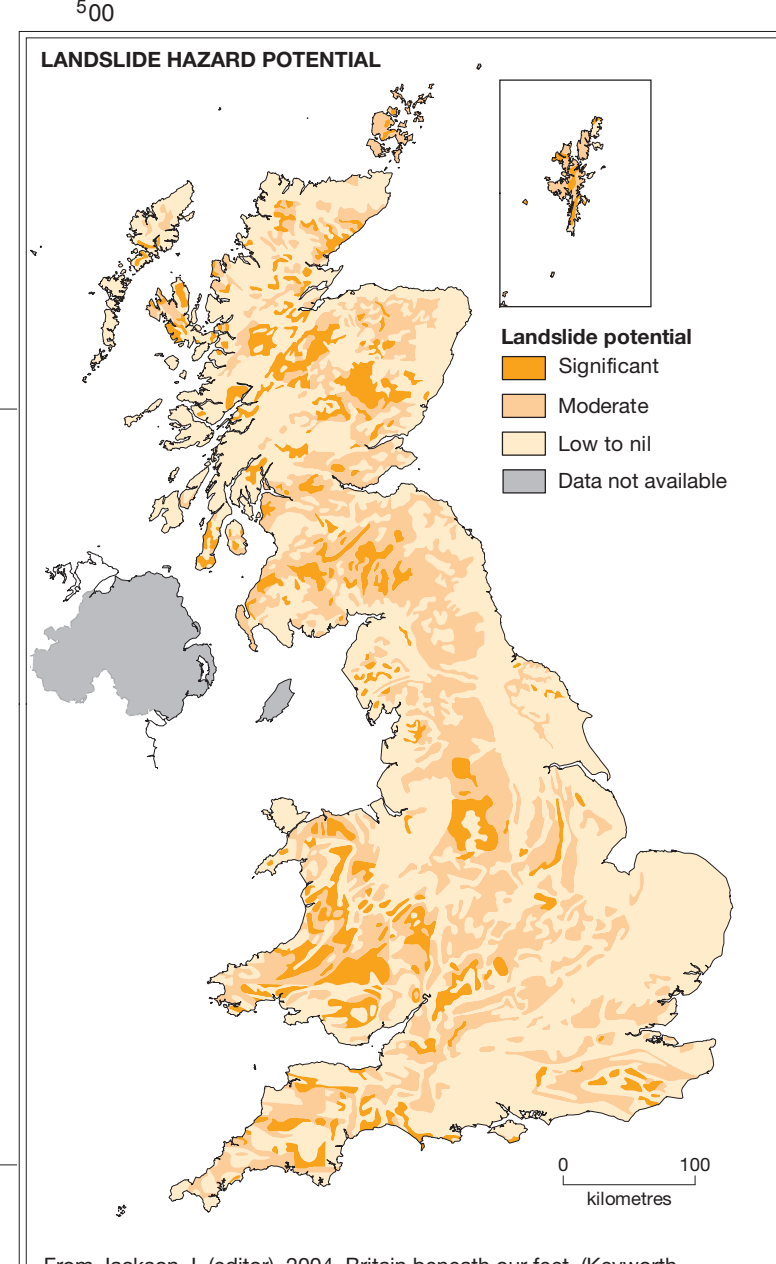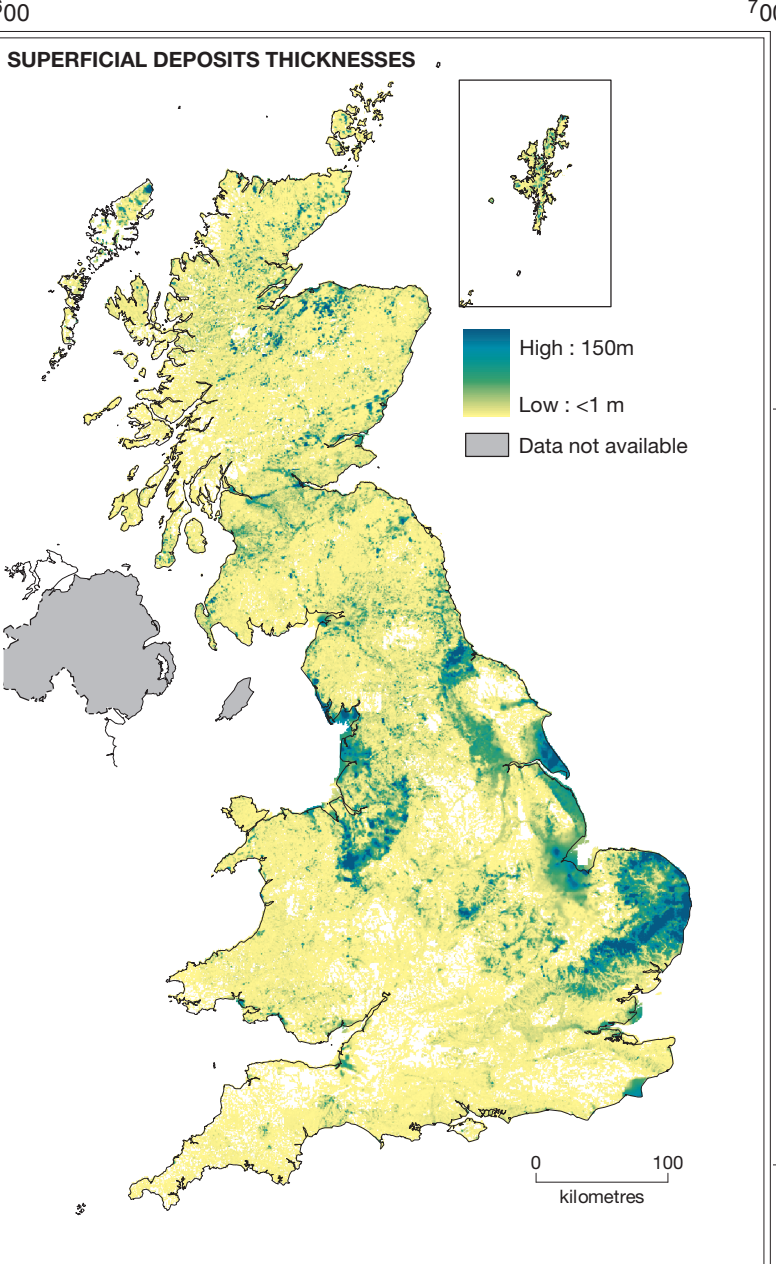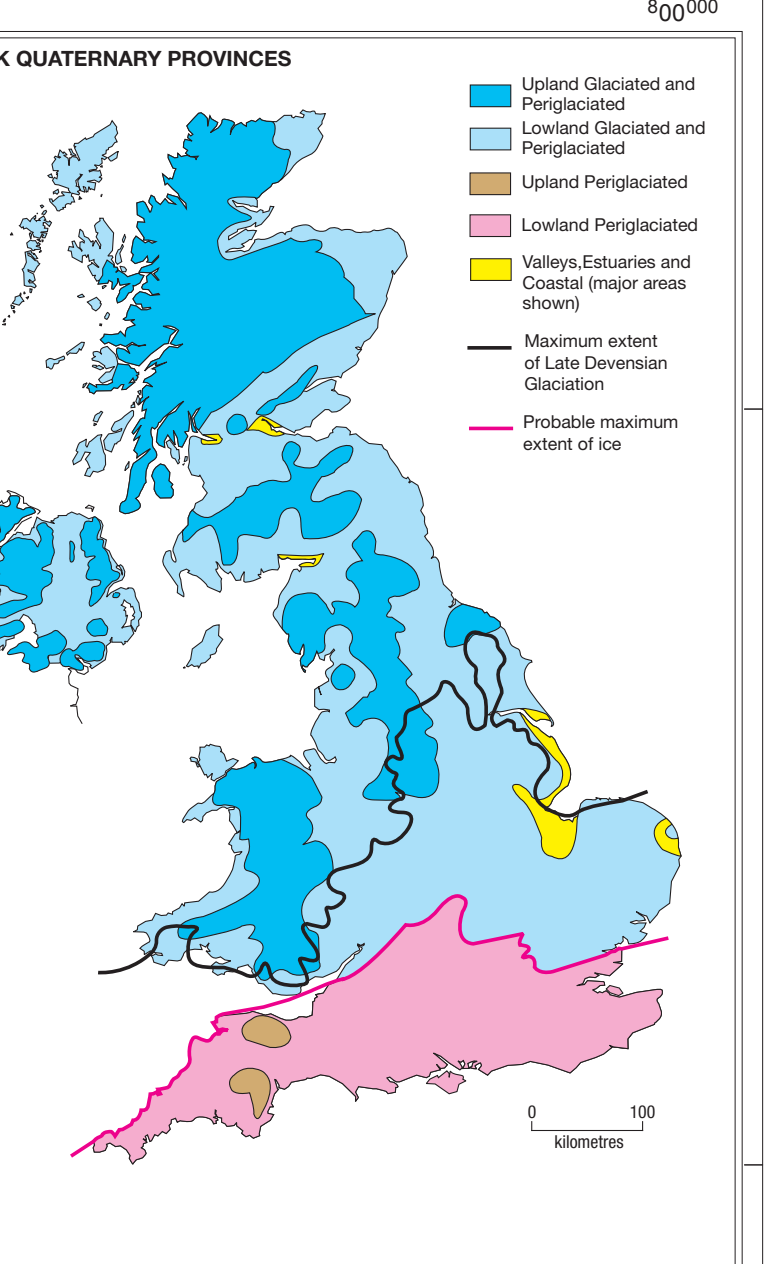

| LITHOLOGY             | DESCRIPTION (After BS5930:1999)                                                                                                                                                                                                                                                                                                                                                                                                                             |
|-----------------------|-------------------------------------------------------------------------------------------------------------------------------------------------------------------------------------------------------------------------------------------------------------------------------------------------------------------------------------------------------------------------------------------------------------------------------------------------------------|
| Organic Soil          | Very soft to firm fibrous to amorphous PEAT. Deposits may be selectively worked to shallow depth in some areas. Very low to moderate permeability; flow dominantly through matrix.                                                                                                                                                                                                                                                                          |
| Coarse Soil           | Loose to dense fine to coarse-grained SAND or SAND and GRAVEL with some cobbles. Sandy clay and silt, sometimes laminated, occur locally, especially within terrace deposits which may also contain peat. High to very high permeability; flow is through matrix. Includes glaciofluvial sand and gravel, river terrace deposits, blown sand, coarse marine, coarse alluvium, head and tail deposits.                                                       |
| Fine Soil             | Very soft to very stiff sometimes sandy CLAY or SILT. Desiccation of top few metres may result in firm to stiff material overlying soft to very soft deposits at depth. Generally very low to moderate permeability; flow dominantly through fissures. Includes lacustrine deposits, glacio-lacustrine deposits, the marine deposits, estuarine alluvium and lowland river alluvium (any of which may contain peat beds or lenses) and loess/loessic soils. |
| Fine and Coarse Soil  | Soft to stiff sandy gravelly CLAY or clayey SAND and GRAVEL. Very low to high permeability; flow dominantly through fissures if low and matrix if high. Includes Clay-with-flints and some Head deposits.                                                                                                                                                                                                                                                   |
| Fine Till             | Firm to very stiff or hard slightly gravelly sandy CLAY with few cobbles and boulders. Occasional medium to extremely widely spaced interbeds and lenses of sand and gravel may be present. Often fissured particularly in the upper few metres. Generally low permeability; flow through fissures and lenses/interbeds of sand and gravel where present.                                                                                                   |
| Coarse Till           | Firm to very stiff or hard gravelly sandy CLAY with many cobbles and boulders, which may be strong. Often fissured particularly in the upper few metres. Occasional medium to extremely widely spaced interbeds and lenses of sand and gravel may be present. Generally low permeability; flow through fissures and lenses/interbeds of sand and gravel where present.                                                                                      |
| Fine Till / Layered   | Firm to very stiff or hard slightly gravelly sandy CLAY with interbeds of laminated clay/silt and beds/lenses of sand and gravel. Often fissured, particularly in the upper few metres. Low to high permeability; flow dominantly through lenses/interbeds of sand and gravel.                                                                                                                                                                              |
| Coarse Till / Layered | Dense to very dense clayey SAND and GRAVEL with some cobbles and boulders. Low to moderate permeability; flow dominantly through matrix.                                                                                                                                                                                                                                                                                                                    |
| Coarse Till / Layered | Dense to very dense COBBLES and Boulders with medium to very widely spaced thin to very thick interbeds of sand and gravel. Low to high permeability; flow dominantly through lenses/interbeds of sand and gravel.                                                                                                                                                                                                                                          |

Note: Superficial deposits are shown only where mapping or boreholes prove deposits to be generally over 1 m thick. The deposits shown are those at surface; other superficial deposits may be present at depth.

Reference: British Standard BS5930:1999. Code of Practice for Site Investigations, incorporating Amendment 2 (2010). British Standards Institution: London.

| PROVINCE                                   | LANDFORMS                                                                                                           | DEPOSITS                                                                                                                                                                                                                     |
|--------------------------------------------|---------------------------------------------------------------------------------------------------------------------|------------------------------------------------------------------------------------------------------------------------------------------------------------------------------------------------------------------------------|
| Upland Glaciated                           | Ice-scoured valleys and corries which contain glacial till and moraines.                                            | Till, glaciofluvial deposits, alluvial fans, alluvium and peat. Landslip deposits.                                                                                                                                           |
| Lowland Glaciated (within Devensian limit) | Dunlin fells, outwash terraces and by-passed features such as oxbow and tail and glacial fluvial drainage channels. | Frequently thick and complex sequences of till and glaciofluvial deposits. Glacio-lacustrine deposits, raised marine deposits, raised beach deposits in coastal and estuarine settings. Alluvium and river terrace deposits. |
| Lowland Glaciated (beyond Devensian limit) | Featureless till plateaux sometimes with complex glaciofluvial deposits.                                            | Thick complex sequences of interbedded till and glaciofluvial deposits. Alluvium and river terrace deposits.                                                                                                                 |
| Upland Periglacial                         | Mountain-top residual deposit summits.                                                                              | Variously weathered bedrock. Head deposits, talus, peat and alluvium. Landslip deposits.                                                                                                                                     |
| Lowland Periglacial                        | Patterned ground (chalk polygons and stripes).                                                                      | Head, clay-with-flints (residual deposit of chalk), loess, alluvium and river terrace deposits.                                                                                                                              |
| Valleys, Estuaries and Coastal             | River and marine terraces, dunes forms, estuarine channels and mudflats.                                            | Thick infills of late glacial and post glacial marine, estuarine and lacustrine deposits and peat. Alluvium, river terrace deposits, beach deposits and blown sand.                                                          |

Based upon Foster, S. S. D., Morigi, A. N. and Brown, M. A. E. 1999. Quaternary geology - towards meeting user requirements. (Keyworth; Nottingham: British Geological Survey).

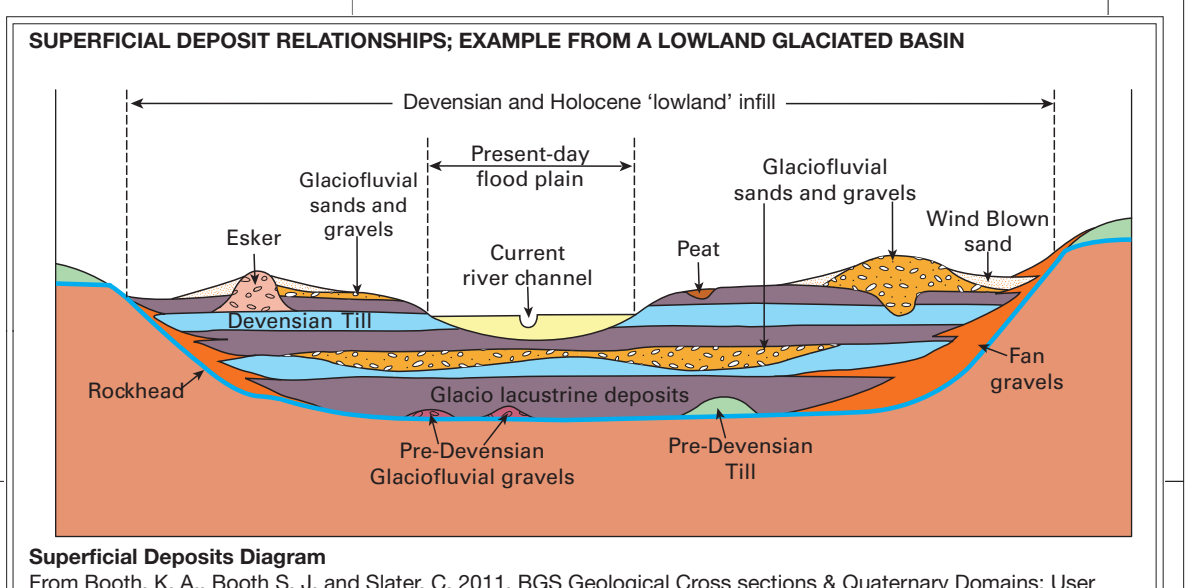

Superficial Deposits Diagram  
From Brock, K. A., Booth, S. J. and Bates, C. 2011. BGS Geological Cross sections & Quaternary Domains: User Guidance Notes. British Geological Survey Internal Report, 10/1012. 36pp.

**ARTIFICIAL GROUND**

Human activity, both at the surface and below it, has resulted in widespread modification of the ground. The legacy of this activity includes both anthropogenic deposits (artificial ground) and voids. As the processes which form artificial ground vary so too do the characteristics of individual deposits. As a consequence, artificial deposits may be highly heterogeneous, variably consolidated and be affected by soil and/or groundwater contamination (Rosenbaum et al. 2003). It is therefore imperative that comprehensive and systematic assessment of artificial ground be made where there is development and regeneration in an urban environment, both for individual construction projects and for regional planning purposes.

Artificial ground can be divided into several different types for mapping and classification purposes (after Rosenbaum et al. 2003). The following scheme has been adopted by the British Geological Survey for its 1:50 000 and 1:10 000 scale geological maps.

Worked Ground consists of areas where the ground is known to have been cut away (excavated) by people and includes quarries, pits, rail cuttings, dredged channels and cut-away landscaping.

Made Ground is an area where the material present is known to have been deposited by human activity on the former natural ground surface; it includes embankments, flood defences, spoil (waste) heaps, coastal reinforcement fill, offshore dumping grounds and construction fill.

Infilled Ground is found where the ground has been excavated and then had fill materials deposited artificially. Examples include party, or wholly, back-filled workings such as pits, quarries and open cast sites.

Landscape Ground is found where the original surface has been extensively remodelled by both excavation and the placing of made ground but where it is impractical to delineate the areas separately.

Disturbed Ground consists of areas of surface or near-surface workings where ill-defined excavations, areas of human-induced subsidence caused by the workings and spoil are mixedly associated with each other for example collapsed pits and shallow mine workings and the spoil from these workings.

Reference: Rosenbaum, M. S., McMillan, A. A., Powell, J. H., Cooper, A. H., Clitheroe, M. G. & Northman, K. J. 2003. Classification of artificial (man-made) ground. Engineering Geology, 69, 399-409.

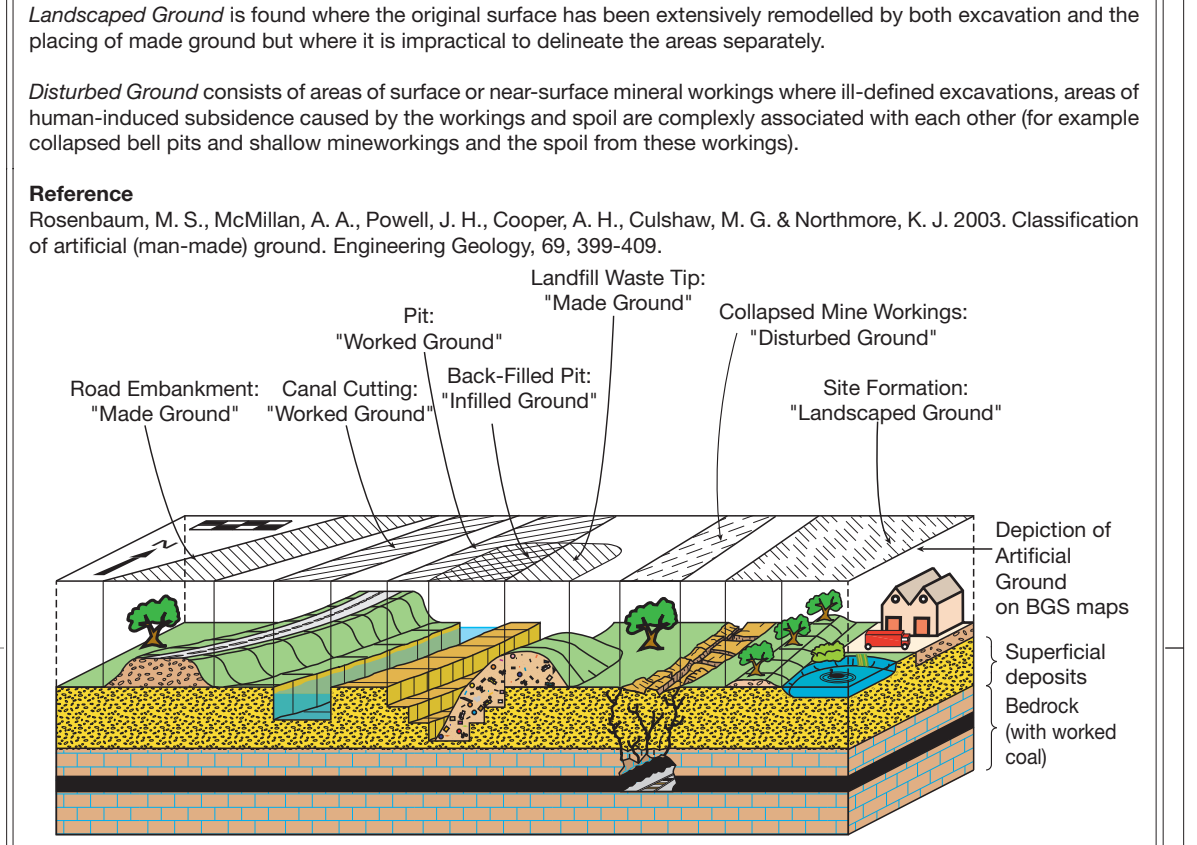

Artificial Deposits Diagram  
From Price, S. J., Burke, H. F., Tetterton, R. L., Reeves, H., Bood, D. & Scheib, A. J. 2010. The 3D characterisation of the zone of human interaction and sustainable use of the ground in urban and peri-urban environments: case studies from the UK. Zeitschrift der Deutschen Gesellschaft für Geowissenschaften, 161 (2), 219-235.

**INTRODUCTION TO THE MAP**

Engineering geology is a broad discipline within geology that is defined by the International Association for Engineering Geology and the Environment (IAEGE) as: "... the science devoted to the investigation, study and solution of the engineering and environmental problems which may arise as the result of the interaction between geology and the works and activities of man as well as to the prediction of and the development of measures for prevention or remediation of geological hazards." Engineering geology is important, therefore, in the maintenance of public health, safety and welfare during development and redevelopment of the earth's surface and subsurface, in safeguarding the geological aspects of the environment and in delivering economic benefit.

Two engineering geological maps of the UK have been produced at a scale of 1:1 million. One map shows the engineering geological characteristics of the bedrock, that is, those soils and rocks that were in place before the Quaternary Period. The second map shows the engineering geological characteristics of the superficial deposits emplaced during approximately the last 2 million years in the Quaternary Period. The reason for this separation is that Quaternary materials cover about 60% of the UK's surface and hence make large parts of the earlier geology. However, they are often relatively thin (less than 10 m) so the bedrock is frequently intersected during building and construction.

These maps should not be used for site specific purposes, their intention is to provide an introduction to the engineering geology of the UK presenting a broad overview of how engineering geological conditions change across the country. They provide the first stage to understanding the consequences of the interaction between human development, the ground and the natural processes acting upon it. For further information regarding engineering geological hazards, GeoSure products and other BGS datasets visit the BGS website (<http://www.bgs.ac.uk>) or contact BGS Enquiries ([enquiries@bgs.ac.uk](mailto:enquiries@bgs.ac.uk)).

Note: Superficial deposits are shown only where mapping or boreholes prove deposits to be generally over 1 m thick. The deposits shown are those at surface; other superficial deposits may be present at depth. Data for Northern Ireland, the Isle of Man and the Orkney and Shetland Islands has been provided where available.

| Material Movement Type | ROCK                                         | DEBRIS                                                   | EARTH                                                        | DESCRIPTION                                                                                                                                                                                                             |
|------------------------|----------------------------------------------|----------------------------------------------------------|--------------------------------------------------------------|-------------------------------------------------------------------------------------------------------------------------------------------------------------------------------------------------------------------------|
| FALLS                  | Rock fall<br>Rock fall Debris                | Debris core<br>Debris core                               | Earth fall<br>Earth fall                                     | FALLS - Mass detached from steep slope/off along surface with little or no shear displacement, deposits mostly through the air by free fall, bouncing or rolling.                                                       |
| TOPPLES                | Rock topple                                  | Debris topple                                            | Earth topple<br>Debris core                                  | TOPPLES - forward rotation about a pivot point.                                                                                                                                                                         |
| SLIDES                 | Rotational<br>Translational (planar)         | Multiple rotational slides<br>Multiple rotational slides | Successive rotational slides<br>Successive rotational slides | ROTATIONAL SLIDES - sliding outwards on one or more concave-upward failure surfaces.<br>TRANSITIONAL (PLANAR) SLIDES - sliding on a plane failure surface running more or less parallel to the slope.                   |
| SPREADS                | Clay-rich horizontal<br>Clay-rich horizontal | Clay-rich horizontal<br>Clay-rich horizontal             | Clay-rich horizontal<br>Clay-rich horizontal                 | SPREADS - involve the fracturing and lateral extension of coherent rock or soil masses due to plastic flow or liquefaction of subjacent material.                                                                       |
| FLOWS                  | Solution flows (periglacial debris)          | Debris flow                                              | Earth flow (fluid flow)                                      | FLOWS - slow to rapid mass movements in saturated materials which advance by fluid flow. Some flows may be bounded by basal and marginal shear surfaces but the downward movement of the displaced mass is by buoyancy. |
| COMPLEX                | e.g. Slump-landflow with rotational debris   | e.g. composite, non-circular debris flow                 | e.g. composite, non-circular debris flow                     | COMPLEX SLIDES - slides involving two or more of the main movement types in combination.                                                                                                                                |

Based on: Cruden, D. M. and Varnes, D. J. 1996. Landslide types and processes. In Special Report 247: Landslides: Investigation and Mitigation, Transportation Research Board, Washington, DC.

The International Geotechnical Societies' UNESCO Working Party Report on World Landslide Inventory, 1990. A suggested method for reporting a landslide. Bulletin of Engineering Geology and the Environment, 10(4), No. 1.

The International Geotechnical Societies' UNESCO Working Party Report on World Landslide Inventory, 1993. A suggested method for describing the activity of a landslide. Bulletin of Engineering Geology and the Environment, 10(4), No. 1, 53-57.

| SINKHOLE CLASSIFICATION         | FORMATION PROCESS                                                 | HOST ROCK TYPES                                         | FORMATION SPEED                                         | TYPICAL MAX SIZE                                 | ENGINEERING HAZARD                                       | OTHER NAMES IN USE                                             |
|---------------------------------|-------------------------------------------------------------------|---------------------------------------------------------|---------------------------------------------------------|--------------------------------------------------|----------------------------------------------------------|----------------------------------------------------------------|
| SOLUTION SINKHOLE               | dissolution lowering of surface limestone, dolomite, gypsum, salt | stable formations evolving over > 20,000 years          | up to 1000 m across and 100 m deep                      | Failure and cave drains must exist beneath floor | dissolution sinkholes, cockpit, doline                   |                                                                |
| COLLAPSE SINKHOLE               | rock roof failure into underlying cave                            | limestone, dolomite, gypsum, salt                       | extremely rare, rapid failure events, into old cave     | up to 300 m across and 100 m deep                | unstable breakdown floor, failure of loaded cave roof    | cave collapse sinkhole, crotche                                |
| CAPROCK SINKHOLE                | failure of residual rock into cave in soluble rock below          | any rock overlying limestone, dolomite, gypsum          | rare failure events, evolve over > 10,000 years         | up to 300 m across and 100 m deep                | unstable breakdown floor                                 | subsequent collapse sinkhole, interstitial karst               |
| SUBSIDENCE SINKHOLE - DROPOUT   | soil collapse into soil void formed over bedrock fissure          | cohesive soil overlying limestone, dolomite, gypsum     | in minutes, into soil void evolved over months or years | up to 50 m across and 10 m deep                  | the main threat of instant failure in soil-covered karst | subsurface sinkhole, cover-collapse sinkhole, aluvial sinkhole |
| SUBSIDENCE SINKHOLE - SUFFOSION | down washing of soil into fissures in bedrock                     | non-cohesive soil overlying limestone, dolomite, gypsum | subsiding over months or years                          | up to 50 m across and 10 m deep                  | slow destructive subsidence over years                   | subsurface sinkhole, cover-collapse sinkhole, aluvial sinkhole |
| BURIED SINKHOLE                 | bedrock to rock, soil-filled after environmental change           | rockhead depression in limestone, dolomite, gypsum      | stable features of geology, evolved over > 10,000 years | up to 300 m across and 100 m deep                | local subsidence on soft fill surrounded by stable rock  | filled sinkhole, compaction sinkhole, paleosinkhole            |

Reproduced with permission, Copyright A.C. Wallman

Reference: Wallman, A.C., Bell, F.G., Cuthbert, M.G. 2005. Sinkholes and subsidence: karst and cavernous rocks in engineering and construction. Springer: Berlin.

**British Geological Survey**  
NATURAL ENVIRONMENT RESEARCH COUNCIL

1:1 000 000 SERIES  
**ENGINEERING GEOLOGY (SUPERFICIAL) MAP OF THE UNITED KINGDOM**

Compiled by William R. Daemen, Marcus R. Dobbie, Martin G. Cuthbert, Kevin J. Northman, David C. Entwistle and Helen J. Reeves.  
Published 2011. Jane N. Ludlow, PhD, Director, British Geological Survey.  
Engineering geological mapping units based on British Geological Survey 1:625 000 Geological Map of the United Kingdom (North and South sheets).

Bibliographic reference:  
BRITISH GEOLOGICAL SURVEY 2011. Engineering Geology (Superficial) Map of the United Kingdom. WILLIAM R. DAEMEN, MARCUS R. DOBBIE, MARTIN G. CUTHBERT, KEVIN J. NORTHMAN, DAVID C. ENTWISTLE and HELEN J. REEVES (compilers). British Geological Survey.

Published 2011. British Geological Survey, Natural Environment Research Council. Geological map © NERC 2011. All rights reserved.

Digital preparation by Anthony H. Myers.  
Data cartography by Caron Simpson, BGS, Keyworth.

Copyright of BGS maps  
The copyright of material derived from the British Geological Survey's work is vested in the Natural Environment Research Council (NERC). No part of these materials may be reproduced or transmitted in any form or by any means, electronic or mechanical, including photocopying, recording, or by any information storage and retrieval system, without the prior permission of the BGS. Requests for a closed network version of any data, without the prior permission of the BGS, should be sent to the British Geological Survey, Keyworth, Nottingham, NG12 5EQ. Telephone 01533 3103.
